# Supplementary material for: Magnetic hollow micro-sized nanoaggregates for synergistically accelerating PET glycolysis
Source: Royal Society of Chemistry journal article supplement (doi:10.1039/d3gc01762a), 2023-01-01
Supplement: d3gc01762a1.pdf [file d3gc01762a1.pdf]

## Appendix A. Supporting information

The TEM image, XRD pattern and hysteresis loop of Fe<sub>3</sub>O<sub>4</sub> NPs, SEM images and BET surface areas of regulated ZnO-Fe<sub>3</sub>O<sub>4</sub> HMNAs, TEM and SEM images of unmodified ZnO NPs and ZnO-UM-Fe<sub>3</sub>O<sub>4</sub> HMNAs, XRD patterns of obtained ZnO NPs, digital photographs of spray-dried samples attracted to a magnet, SEM images (inset: elemental mappings) and XRD patterns of CeO<sub>2</sub>-Fe<sub>3</sub>O<sub>4</sub> and ZIF-8-Fe<sub>3</sub>O<sub>4</sub>, <sup>1</sup>H and <sup>13</sup>C NMR spectra of the monomer, WHSV values of mentioned catalysts for the glycolysis of PET. (PDF)
