# Supplementary material for: Magnetic hollow micro-sized nanoaggregates for synergistically accelerating PET glycolysis
Source: Royal Society of Chemistry journal article supplement (doi:10.1039/d3gc01762a), 2023-01-01
Supplement: d3gc01762a2.pdf [file d3gc01762a2.pdf]

# Supporting Information

## Magnetical hollow micro-sized nanoaggregates for synergistically accelerating PET glycolysis

Ling-Xia Yun<sup>a,b</sup>, Yan Wei<sup>a,b</sup>, Qian Sun<sup>c</sup>, Yu-Ting Li<sup>a,b</sup>, Bin Zhang<sup>a,b</sup>, Hang-Tian Zhang<sup>b,\*</sup>, Zhi-Gang Shen<sup>d</sup>, Jie-Xin Wang<sup>a,b,\*</sup>

*<sup>a</sup>State Key Laboratory of Organic-Inorganic Composites, Beijing University of Chemical Technology, Beijing 100029, PR China;*

*<sup>b</sup>Research Center of the Ministry of Education for High Gravity Engineering and Technology, Beijing University of Chemical Technology, Beijing, 100029, PR China;*

*<sup>c</sup>Guangxi Key Laboratory of Petrochemical Resource Processing and Process Intensification Technology and School of Chemistry and Chemical Engineering, Guangxi University, Nanning, 530004, PR China;*

*<sup>d</sup>School of Chemical Engineering, Xiangtan University, Xiangtan, Hunan, 411105*

Total number of pages: 10

Total number of Fig.s:13 (Fig.s S1-S13)

Total number of Tables:1 (Table S1)

---

\* Corresponding authors:

Hang-Tian Zhang, E-mail: [zhanghangtian\\_zemon@outlook.com](mailto:zhanghangtian_zemon@outlook.com) (H.T. Zhang)

Jie-Xin Wang, E-mail: [wangjx@mail.buct.edu.cn](mailto:wangjx@mail.buct.edu.cn) (J.X. Wang)

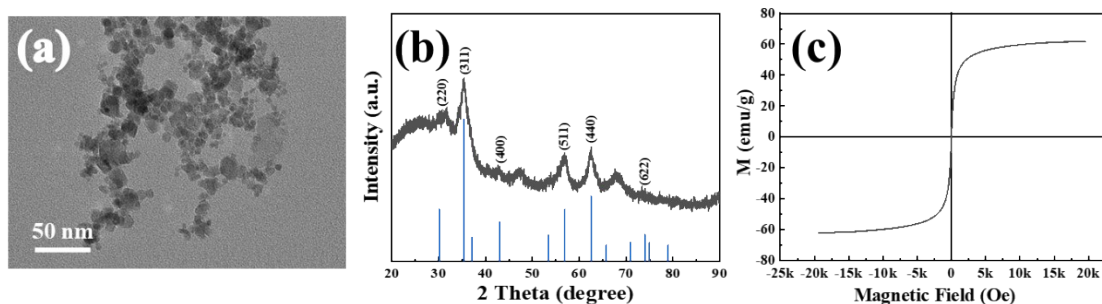

**Fig. S1.** (a) The TEM image, (b) XRD pattern and (c) hysteresis loop of  $\text{Fe}_3\text{O}_4$  NPs.

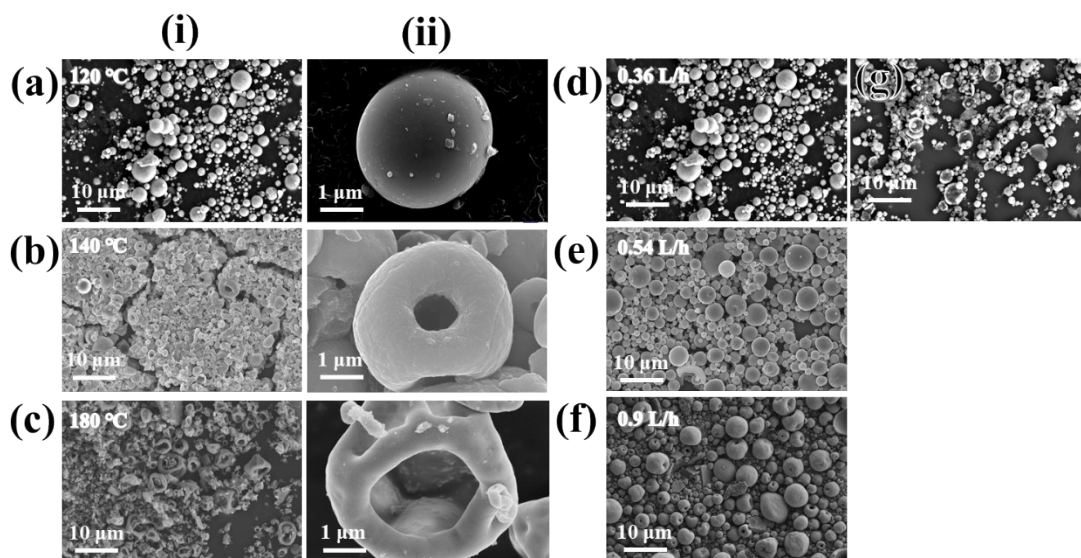

**Fig. S2.** SEM images of  $\text{ZnO}$ -3.5 nm- $\text{Fe}_3\text{O}_4$  HMNAs obtained under different inlet temperatures: (a) 120 °C, (b) 140 °C, (c) 180 °C and different feed rates: (d) 0.36 L/h, (e) 0.54 L/h, (f) 0.9 L/h. (g) The SEM image of cracked hollow microspheres after the ultrasound treatment for a period of time.

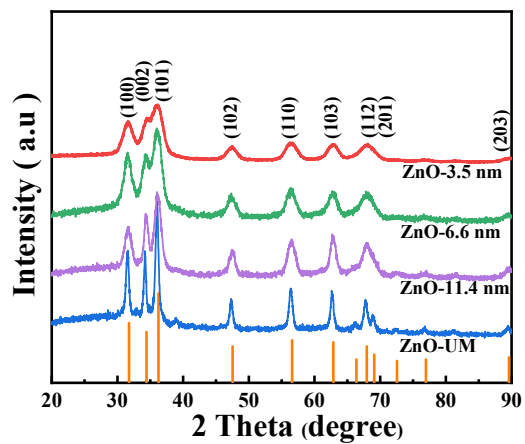

Fig. S3. XRD patterns of obtained ZnO NPs.

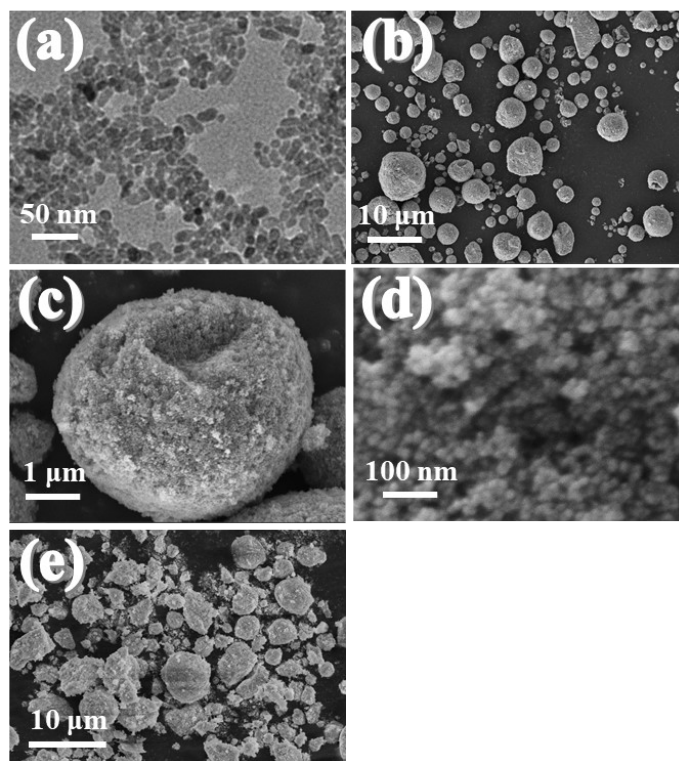

Fig. S4. (a) TEM images of the ZnO-UM suspension. (b-d) SEM images of the ZnO-UM-Fe<sub>3</sub>O<sub>4</sub>-2:1 HMNAs. (e) The SEM image of ZnO-Fe<sub>3</sub>O<sub>4</sub> particles obtained from poorly dispersed ZnO powder.

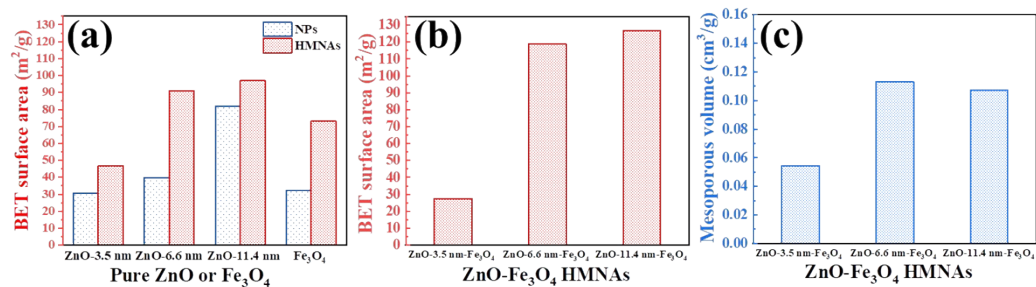

**Fig. S5.** BET surface areas of (a) ZnO NPs and HMNAs, Fe<sub>3</sub>O<sub>4</sub> NPs and HMNAs, (b) ZnO-Fe<sub>3</sub>O<sub>4</sub> HMNAs obtained from different primary sizes of ZnO. (c) Mesoporous volumes of ZnO-Fe<sub>3</sub>O<sub>4</sub> HMNAs.

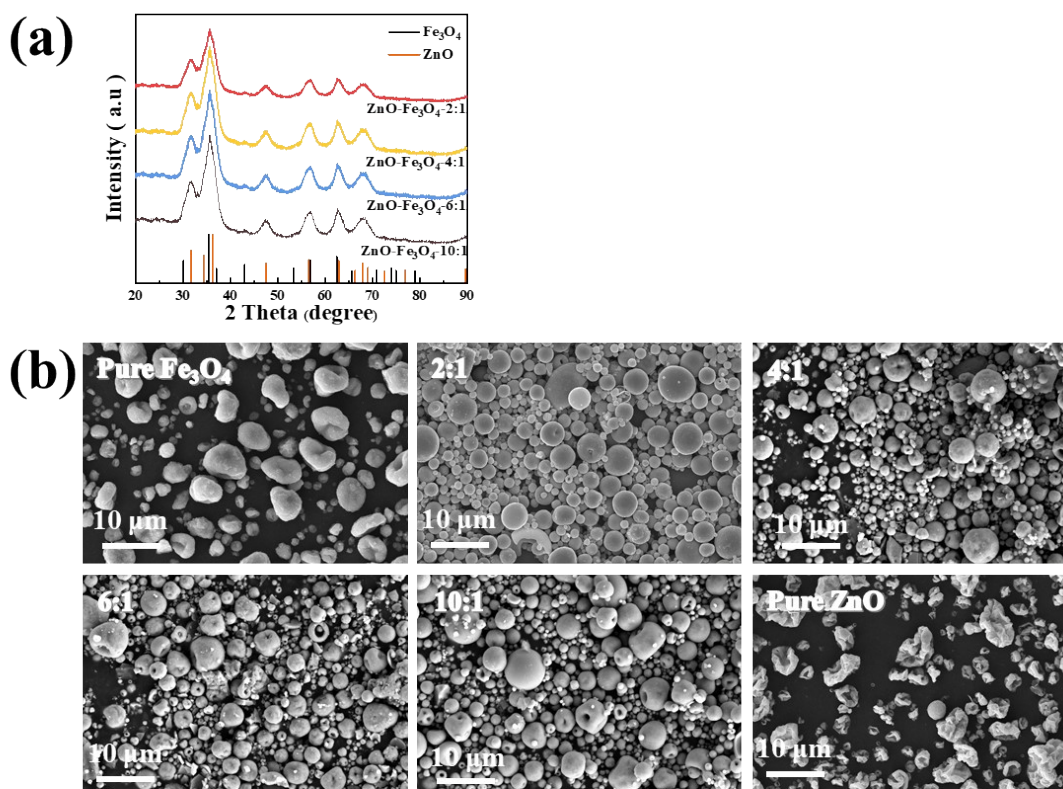

**Fig. S6.** (a) XRD patterns of ZnO-Fe<sub>3</sub>O<sub>4</sub> HMNAs with different weight ratios of ZnO and Fe<sub>3</sub>O<sub>4</sub> NPs

and (b) SEM images.

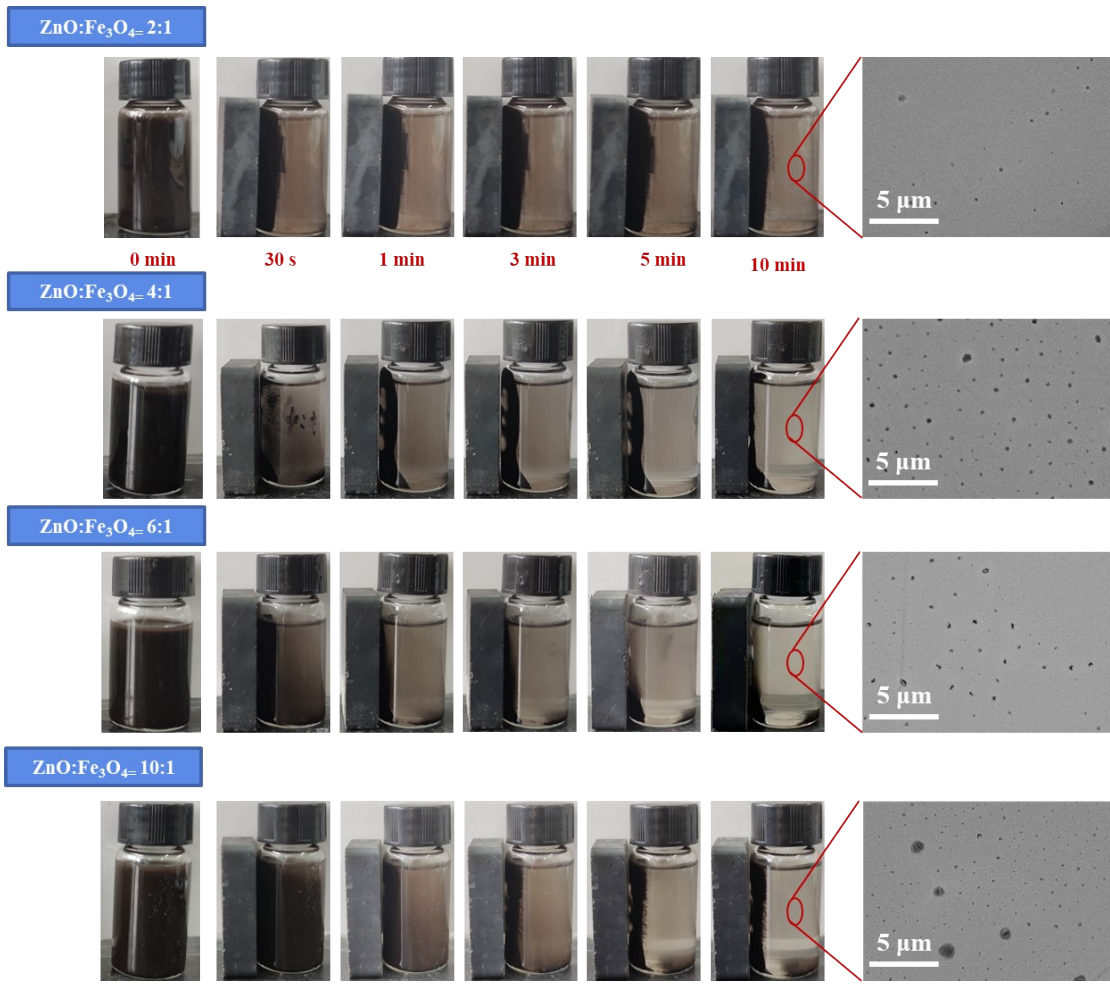

**Fig. S7.** Digital photographs of ZnO-Fe<sub>3</sub>O<sub>4</sub> HMNAs with different weight ratios of ZnO and Fe<sub>3</sub>O<sub>4</sub> NPs

attracted to a magnet (3000 Gs).



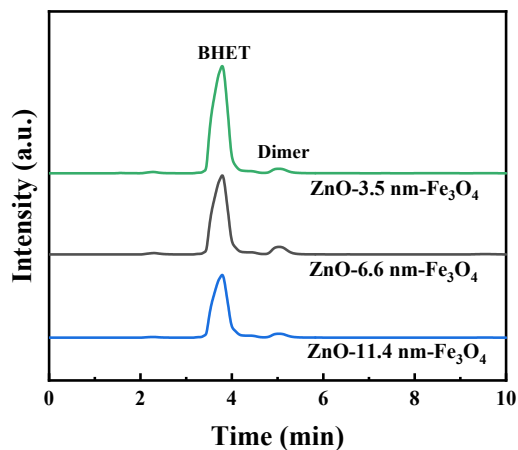

**Fig. S8.** HPLC chromatograms of the glycolysis products catalyzed by (a) ZnO-3.5 nm-Fe<sub>3</sub>O<sub>4</sub> HMNAs, (b) ZnO-6.6 nm-Fe<sub>3</sub>O<sub>4</sub> HMNAs, (c) ZnO-11.4 nm-Fe<sub>3</sub>O<sub>4</sub> HMNAs.

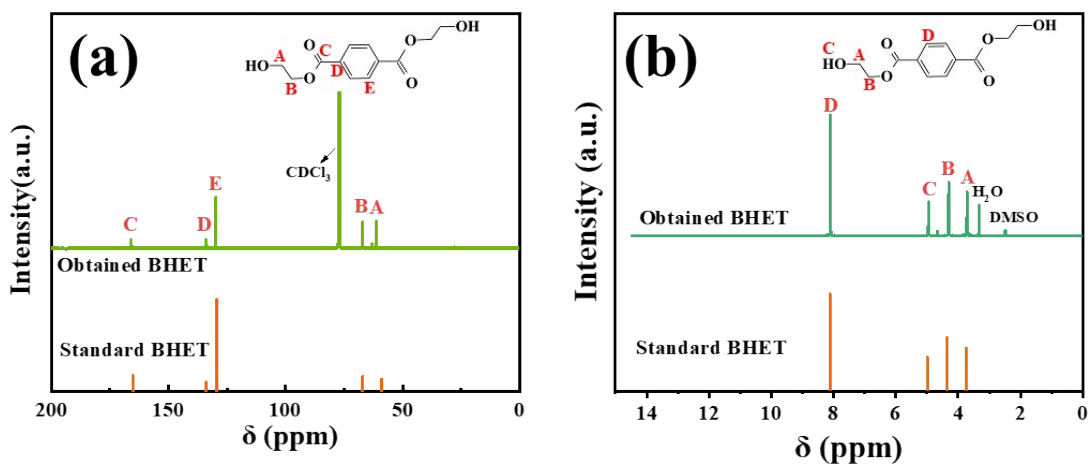

**Fig. S9.** (a) <sup>13</sup>C NMR and (b) <sup>1</sup>H NMR spectra of obtained BHET and standard BHET.

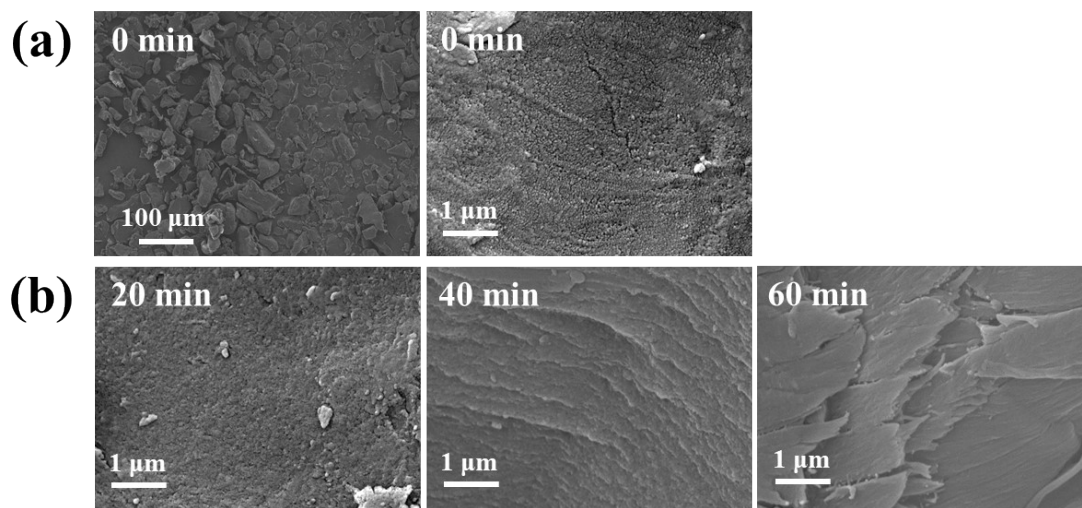

**Fig. S10.** SEM images of (a) virgin PET, (b) residual PET after the glycolysis for different times at 170 °C.

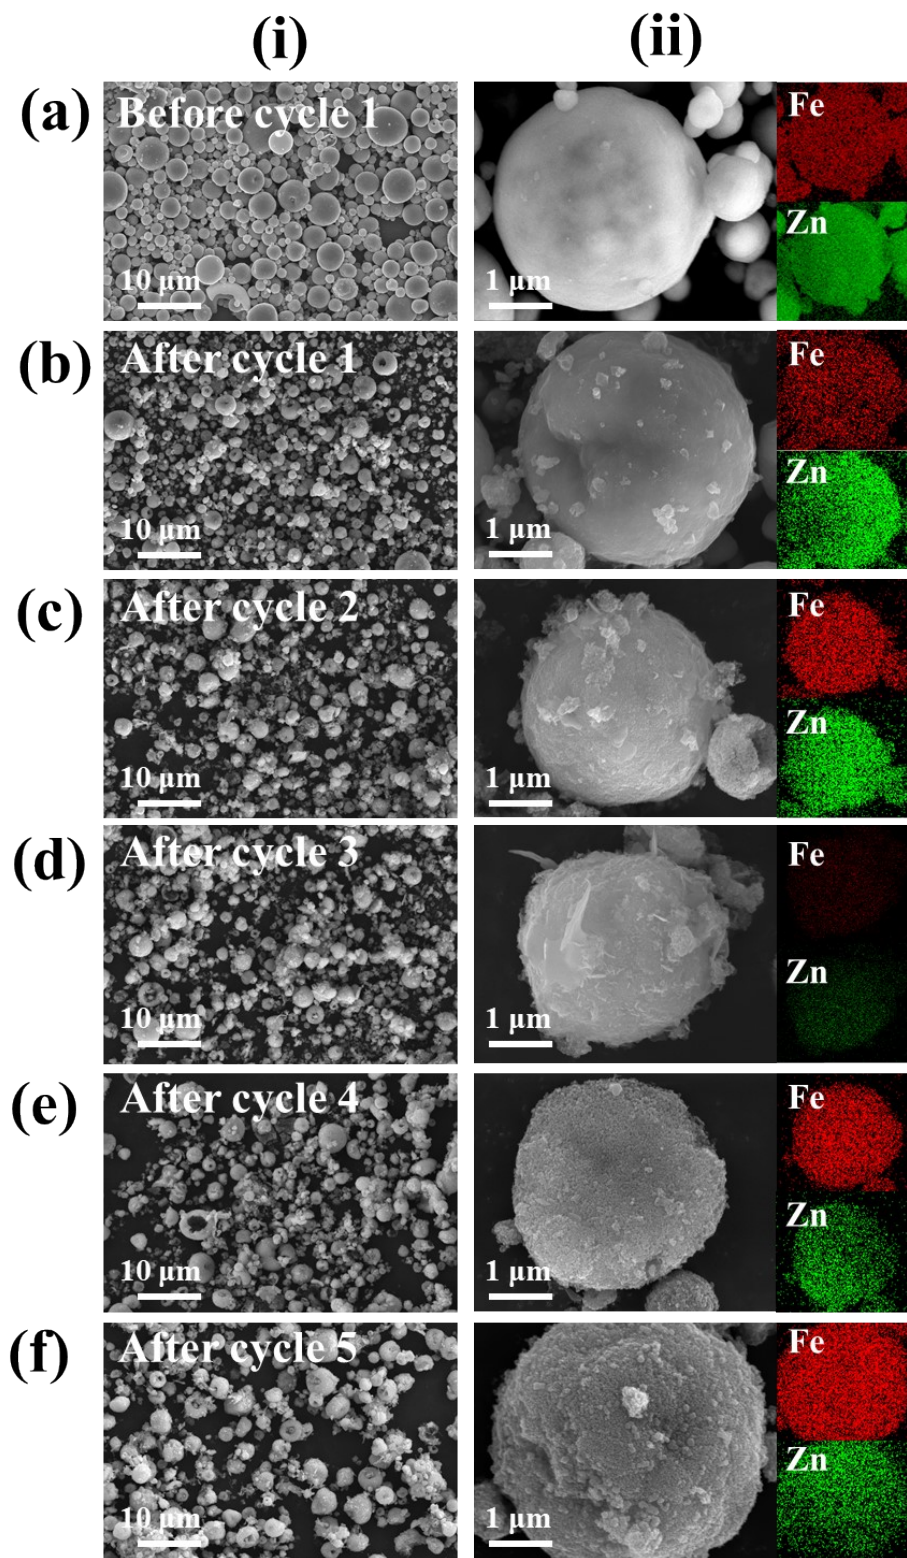

**Fig. S11.** SEM images, elemental mapping and EDS contents of Zn and Fe over the ZnO-Fe<sub>3</sub>O<sub>4</sub> HMNAs

before (a) and after each recycling step (b-f).



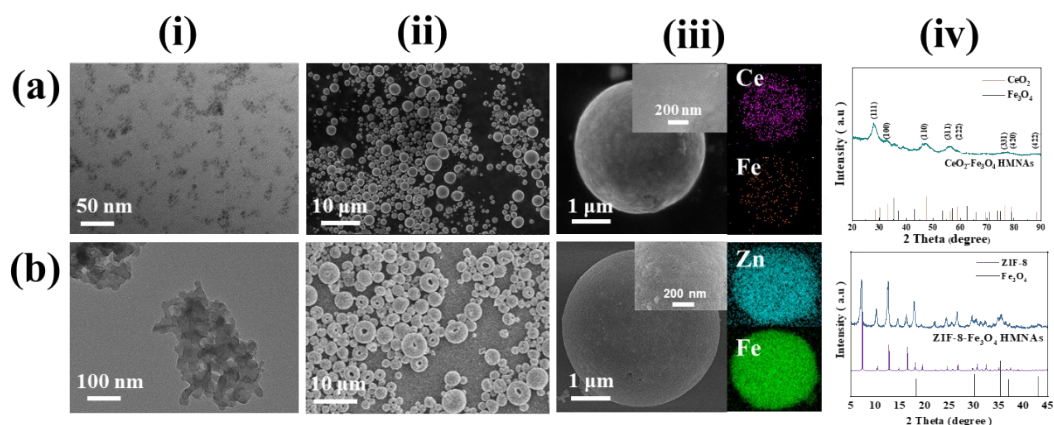

**Fig. S12.** (a)  $\text{CeO}_2$ -2.7 nm and  $\text{CeO}_2$ -2.7 nm- $\text{Fe}_3\text{O}_4$ : (i) TEM image of  $\text{CeO}_2$  nanoparticles. (ii-iii) SEM images of  $\text{CeO}_2$ -2.7 nm- $\text{Fe}_3\text{O}_4$  and elemental mapping. (iv) XRD patterns. (b) ZIF-8-30 nm and ZIF-8- $\text{Fe}_3\text{O}_4$ : (i) TEM image of ZIF-8-30 nm. (ii-iii) SEM images of ZIF-8-30 nm- $\text{Fe}_3\text{O}_4$  and elemental mapping. (iv) XRD patterns.

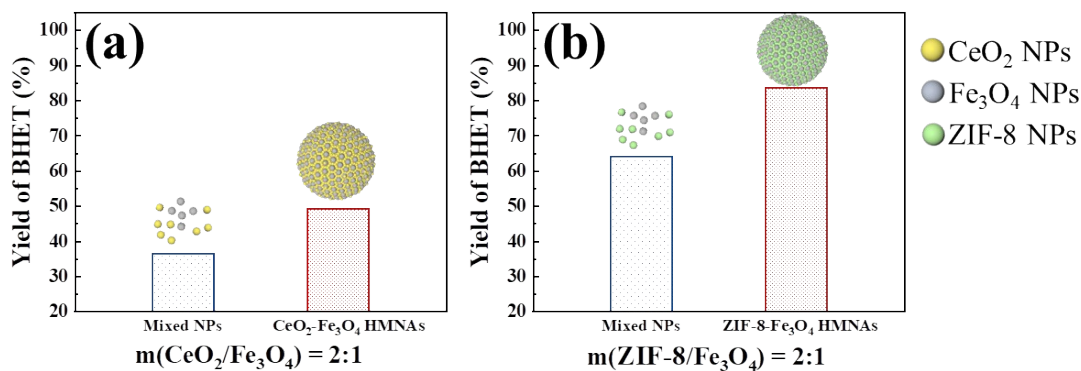

**Fig. S13.** (a)  $\text{CeO}_2$ -2.7 nm and  $\text{Fe}_3\text{O}_4$  NPs directly mixed with the ratio of 2:1 and  $\text{CeO}_2$ - $\text{Fe}_3\text{O}_4$  HMNAs, (b) ZIF-8-30 nm and  $\text{Fe}_3\text{O}_4$  NPs directly mixed with the ratio of 2:1 and ZIF-8- $\text{Fe}_3\text{O}_4$  HMNAs. (glycolysis at 180 °C, 40 min, the weight ratio of EG to PET of 6, catalysts of 1 wt%)

**Table S1.** Comparison of reported catalysts for the glycolysis of PET.

|                                                          | Catalysts                                                     | Mass                        | Temperature<br>(°C) | Time<br>(h) | Product      | WHSV<br>(g <sub>BHET</sub> ·g <sub>cat</sub> <sup>-1</sup> ·h <sup>-1</sup> ) | Ref.      |
|----------------------------------------------------------|---------------------------------------------------------------|-----------------------------|---------------------|-------------|--------------|-------------------------------------------------------------------------------|-----------|
|                                                          |                                                               | ratio of<br>cat./PET<br>(%) |                     |             | yield<br>(%) |                                                                               |           |
|                                                          | ZnO/SBA-15                                                    | 5                           | 197                 | 1           | 91           | 7.16                                                                          | 22        |
|                                                          | rGO[TESPMI] <sub>2</sub> CoCl <sub>4</sub>                    | 0.15                        | 190                 | 3           | 95.2         | 83.21                                                                         | 46        |
| Nonmagnetic<br>catalysts                                 | Graphitic carbon<br>nitride colloid                           | 2.5                         | 196                 | 0.5         | 80.3         | 25.27                                                                         | 12        |
|                                                          | MAF-6                                                         | 1                           | 180                 | 4           | 81.7         | 8.03                                                                          | 45        |
|                                                          | Ultrasmall Co NPs                                             | 1.5                         | 180                 | 3           | 96           | 8.39                                                                          | 11        |
|                                                          | ZnO nanodispersion                                            | 0.7                         | 170                 | 1           | 82.3         | 46.24                                                                         | 13        |
|                                                          | <b>ZnO-Fe<sub>3</sub>O<sub>4</sub> HMNAs</b>                  | 1                           | 190                 | 0.5         | 92.3         | 72.61                                                                         | This work |
| <b>CeO<sub>2</sub>-Fe<sub>3</sub>O<sub>4</sub> HMNAs</b> | 1                                                             | 197                         | 0.75                | 95.39       | 50.03        | This work                                                                     |           |
| <b>ZIF-8-Fe<sub>3</sub>O<sub>4</sub> HMNAs</b>           | 1                                                             | 190                         | 0.33                | 85.2        | 101.55       | This work                                                                     |           |
|                                                          | CoFe <sub>2</sub> O <sub>4</sub> @ZIF-8/ZIF-<br>67            | 1                           | 200                 | 1           | 84.3         | 33.16                                                                         | 16        |
| <b>Magnetic<br/>catalysts</b>                            | CoFe <sub>2</sub> O <sub>4</sub> /C10-OAC                     | 2                           | 195                 | 2.5         | 95.4         | 7.50                                                                          | 43        |
|                                                          | γ-Fe <sub>2</sub> O <sub>3</sub> /nitrogen-<br>doped graphene | 10                          | 195                 | 3           | 100          | 1.31                                                                          | 14        |
|                                                          | Mg-Al-O@Fe <sub>3</sub> O <sub>4</sub>                        | 0.5                         | 240                 | 1.5         | 80           | 41.96                                                                         | 17        |
|                                                          | Zn-MNPs                                                       | 0.8                         | 196                 | 2           | 79.8         | 19.62                                                                         | 44        |
|                                                          | Fe <sub>3</sub> O <sub>4</sub> NPs@h-BNNS                     | 0.2                         | 200                 | 5           | 100          | 39.33                                                                         | 18        |
